# Supplementary material for: Combination of mTORC1/2 inhibitor vistusertib plus fulvestrant in vitro and in vivo targets oestrogen receptor-positive endocrine-resistant breast cancer
Source: PubMed Central journal article supplement (PMC6894349; doi:10.1186/s13058-019-1222-0), 2019-12-04
Supplement: 13058_2019_1222_MOESM4_ESM.pdf [file 13058_2019_1222_MOESM4_ESM.pdf]

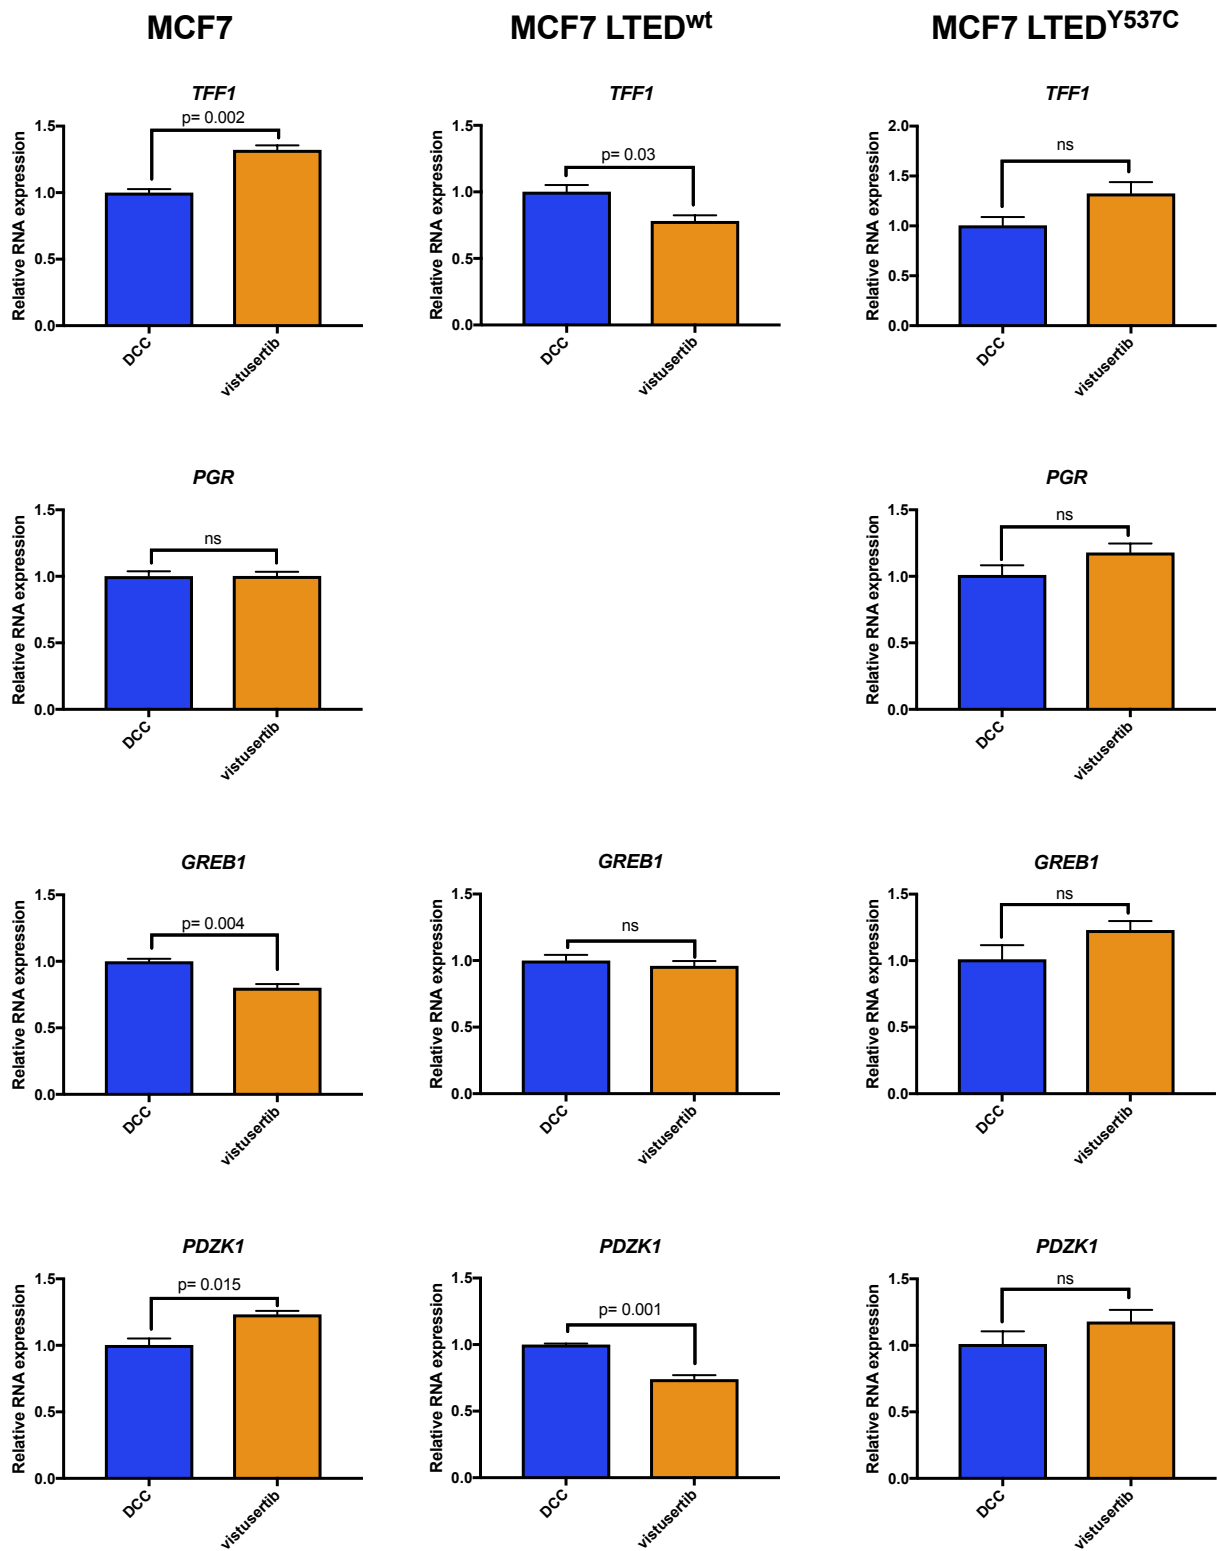

Figure S3
