# Supplementary material for: Combination of mTORC1/2 inhibitor vistusertib plus fulvestrant in vitro and in vivo targets oestrogen receptor-positive endocrine-resistant breast cancer
Source: Springer Nature journal article supplement (doi:10.1186/s13058-019-1222-0), 2019-12-01
Supplement: MOESM2 [file 17469222]

a

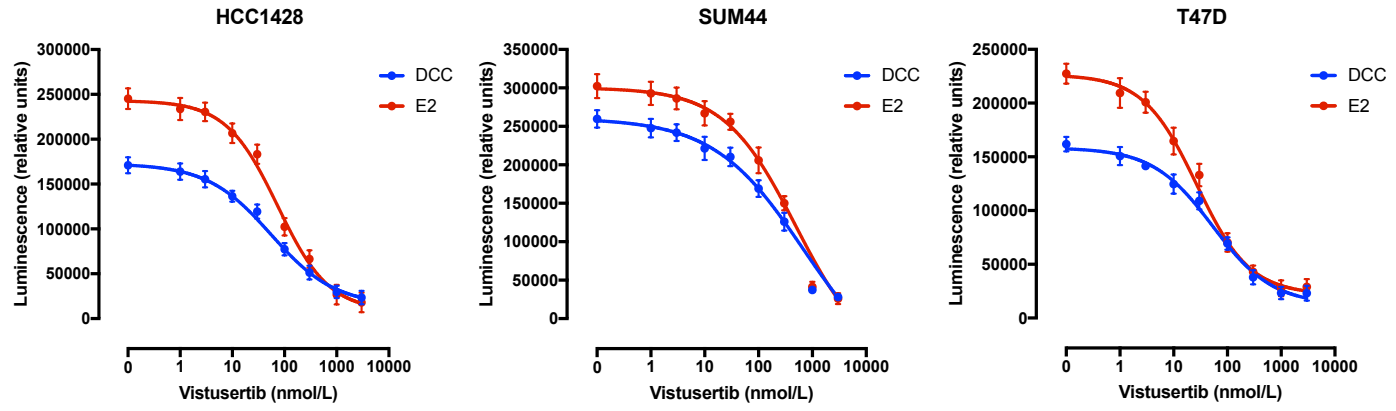

b

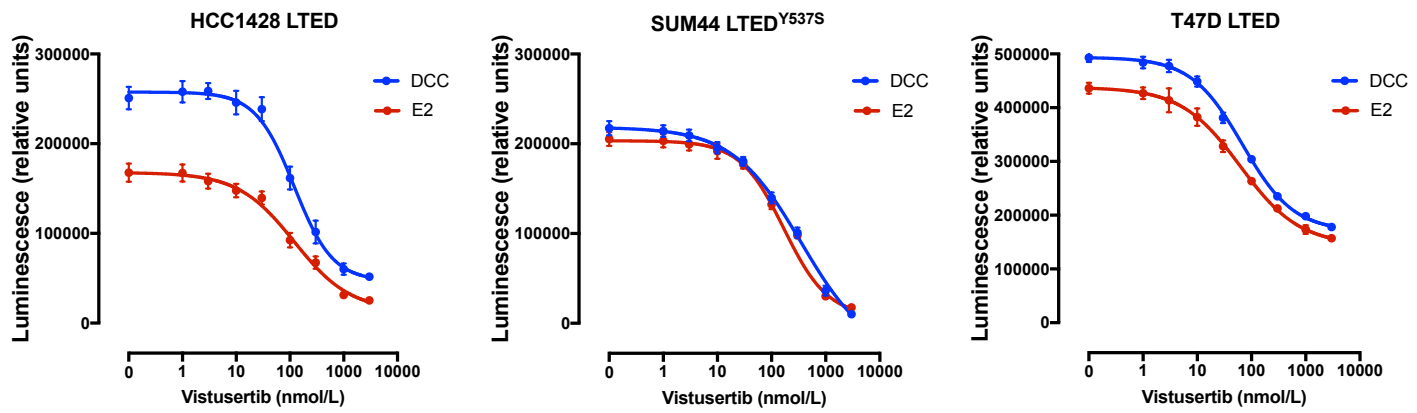

Figure S1
